# Supplementary material
Source: PubMed Central journal article supplement (PMC4014345)
Supplement: f-70-00676-sup1.pdf [file f-70-00676-sup1.pdf]

## Supporting information

**Figure S1** Biosynthesis of the alkaloid ergotamine (**4**) from dimethylallyl tryptophan (**3**). EasF is the closest functionally characterized homolog to the ergothioneine biosynthetic methyltransferase EgtD.

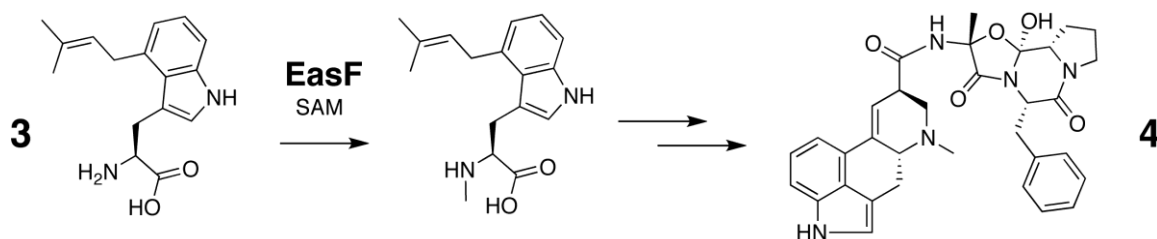

**Figure S2** Analytical size-exclusion chromatography of native EgtD (blue) on an S200 10/300 GL gel filtration column (GE Healthcare). The experiment was conducted at a flow rate of 0.5 ml min<sup>-1</sup> in 20 mM Tris/HCl pH 7.5, 150 mM NaCl at 283 K. A gel filtration protein standard is shown for comparison (black), where numbers correspond to the molecular weight of the proteins. EgtD elutes as a monomer of 35 kDa.

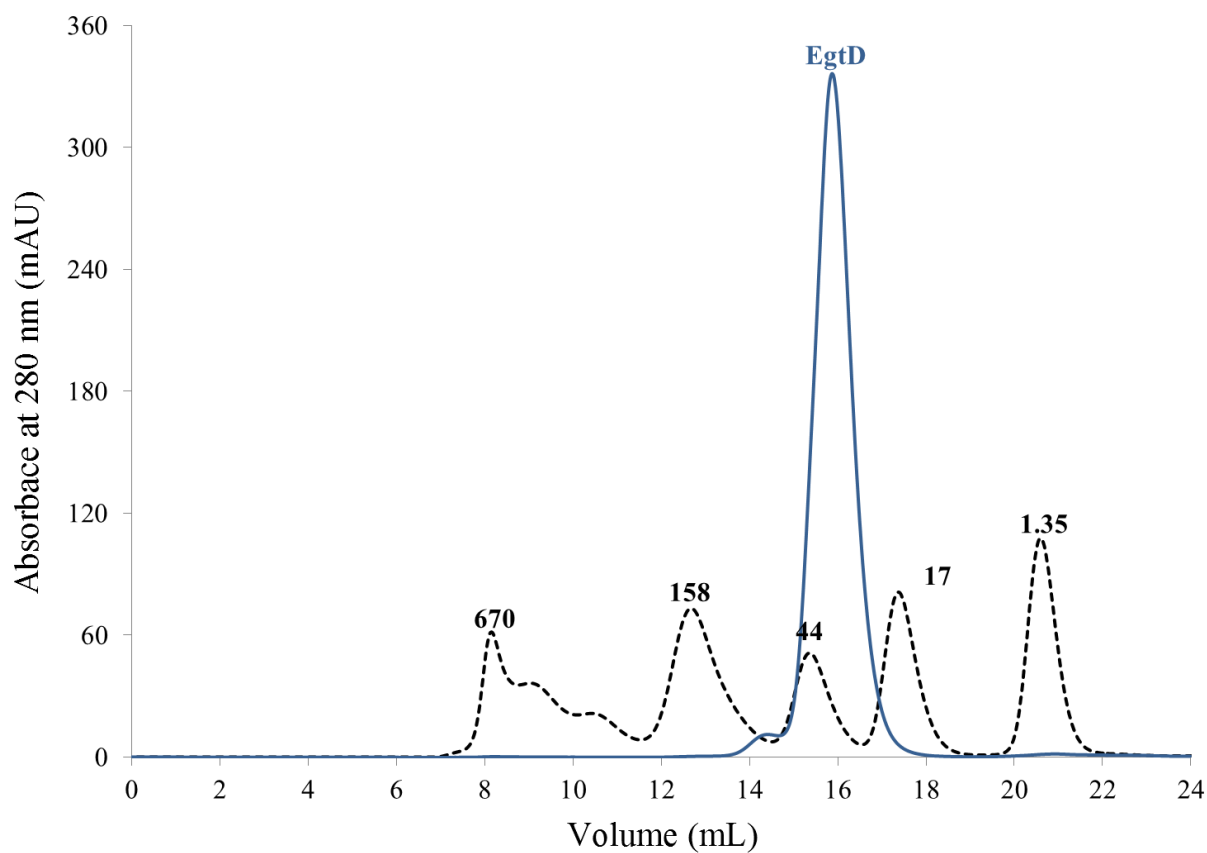

**Figure S3** Excerpt from the log-file of a SHELXD Patterson search for ten anomalous scatterers in the selenium SAD data reported in Table 1. The atom numbers correspond to those shown in the Harker sections of Fig. 3.

```

PSUM 52.20  PSMF Peaks: 86 78 63 62 61 60 57 54 46 42 27 23 23 22 20 20 19
Cycle 20  Peaks 99 88 85 79 76 76 69 66 66 63 14 11 8 5
R = 0.279, Min.fun. = 0.438, <cos> = 0.435, Ra = 0.299

Minimum distances (top row, 0 if special position) and PSMF (bottom row)
Peak   x       y       z       self  cross-vectors

99.9   0.5187  0.0512  0.1915  41.2   Atom 1
                                     22.6

89.2   0.2644-0.2135  0.0803  42.6   31.2   Atom 2
                                     17.4   39.0

85.5   0.1808-0.5460  0.0946  54.1   37.4 25.9   Atom 3
                                     33.9   41.3 28.6

79.8   0.2022-0.1280  0.1472  55.5   27.2 12.2 32.4   Atom 4
                                     35.2   31.0 23.8 16.8

77.0   0.0014-0.1749  0.2666  38.0   40.0 32.1 25.2 22.2   Atom 5
                                     48.1   24.1 28.6 26.9 16.3

76.3   0.7800  0.0559  0.1410  57.8   20.0 40.1 33.4 33.4 28.7   Atom 6
                                     31.4   29.7 36.6 11.7 21.2 22.1

69.9   0.7345  0.1178  0.0324  42.1   27.4 34.4 18.8 41.5 37.2 16.1   Atom 7
                                     21.0   28.9 18.3 18.8 20.9  9.7 23.8

67.0   0.1876-0.6833  0.0461  39.4   36.5 36.2 12.4 36.4 29.3 28.5 12.4   Atom 8
                                     10.6   27.6 29.1 20.7 21.0 20.6 22.6 21.7

66.8   0.9370  0.0770  0.1932  41.9   30.1 35.8 32.0 25.4 20.0 13.5 26.8 32.7   Atom 9
                                     11.4   40.5 18.3 19.3 15.6 20.7 14.8 15.4 15.2

63.3   0.4223  0.1059  0.1207  53.2   12.7 27.2 31.7 24.0 38.0 26.1 25.6 25.4 36.3   Atom 10
                                     14.3   32.6 24.4  9.5 21.5 22.2 18.3 18.8 12.5 12.4

-----

14.2   0.4672-0.0597  0.0326  46.9   23.9 19.8 24.7 25.3 41.0 28.4 23.4 26.6 41.7
                                     0.0   11.7  3.2  0.0  0.0  0.0  0.0  1.7  1.9  0.0

11.5   0.5235  0.1038  0.2077  39.7   4.6 35.1 36.5 30.2 38.2 20.9 28.7 36.6 29.8
                                     0.0   13.0  4.7  0.5  0.0  0.6  5.5  2.4  0.0  0.0

 8.1   0.5120-0.2024  0.0019  36.6   32.5 20.9 26.0 27.9 38.4 33.5 29.3 32.4 39.5
                                     0.0   5.2  1.1  8.0  0.0  4.6  2.8  0.2  2.4  6.8

 5.3   0.2686-0.3521  0.1243  52.1   30.6 12.1 16.5 17.9 30.6 33.5 29.7 27.9 29.8
                                     0.0   0.0  0.0  0.0  0.0  4.1  4.5  4.1  0.1  1.6

PATFOM =  22.90

Try      2, CPU 8, CC All/Weak 52.0 / 35.9, CFOM 88.0, best 88.0, PATFOM  22.90

```
